# Supplementary material
Source: PubMed Central journal article supplement (PMC4556542)

**A**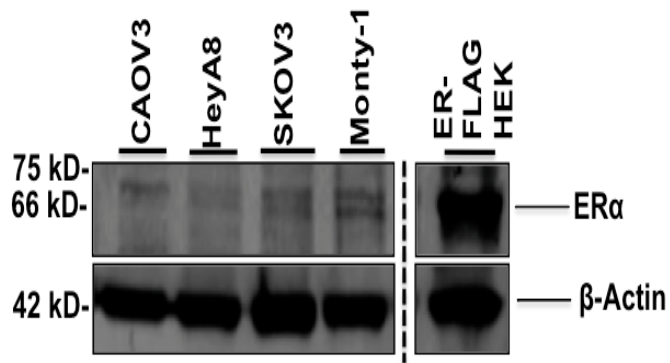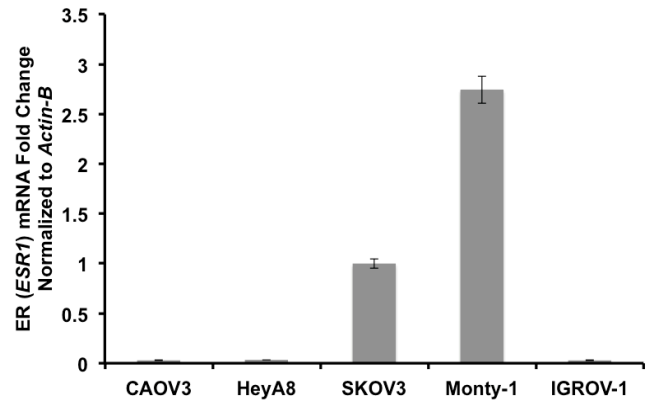**B**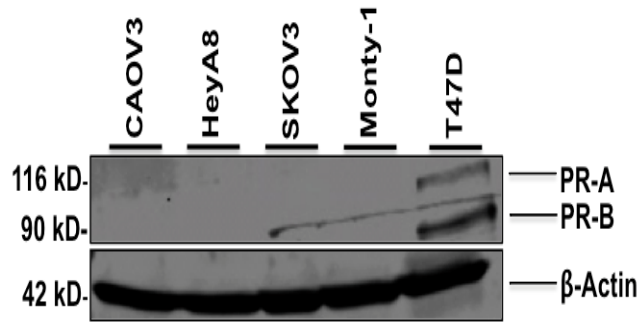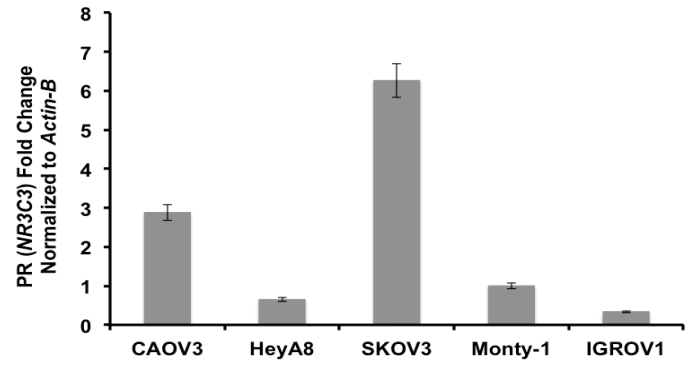**C**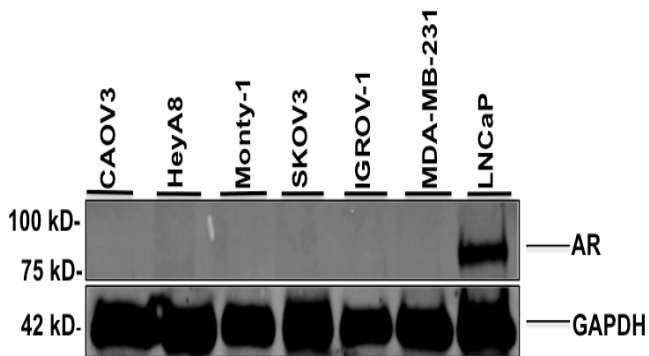**Supplementary Figure 1**

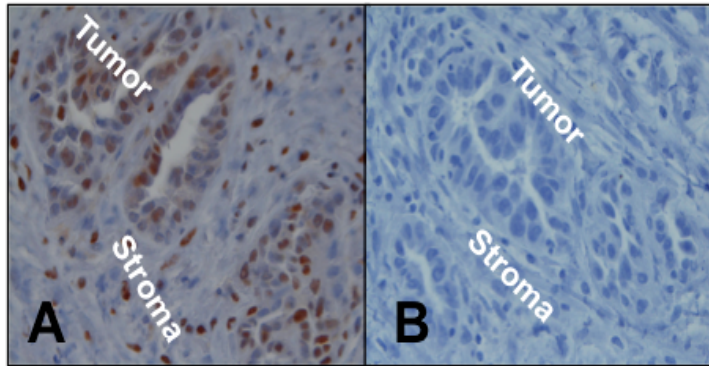

**Supplementary Figure 2**

**A**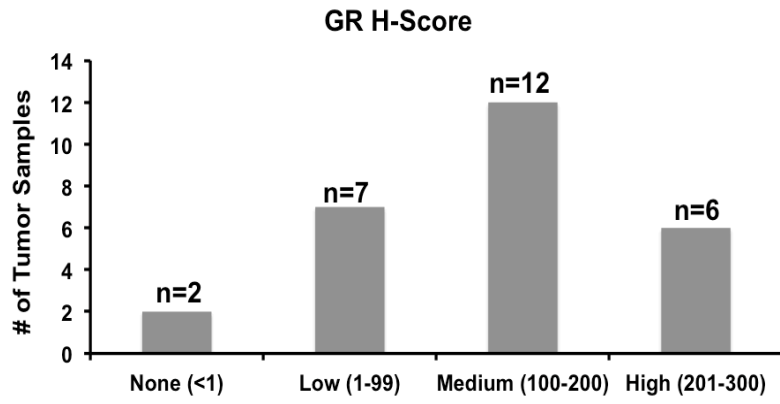**B**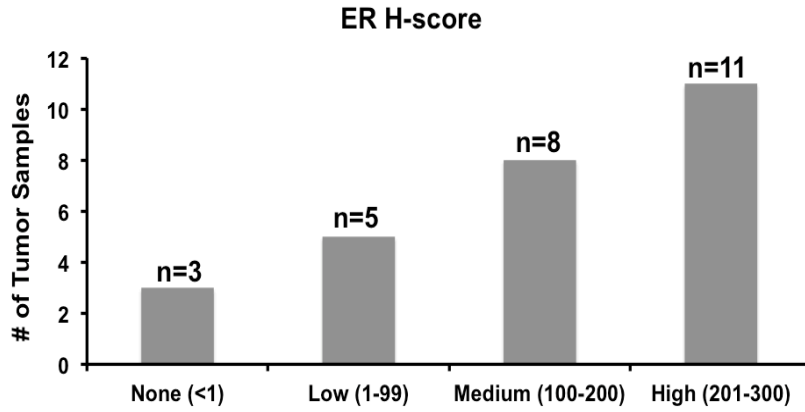**C**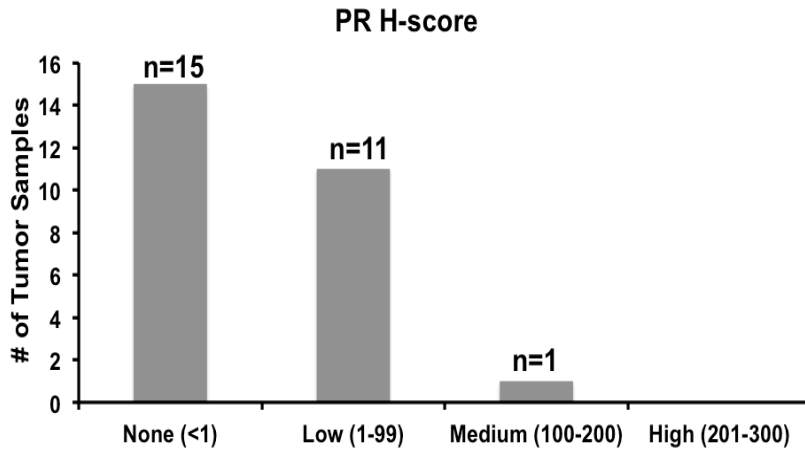**D**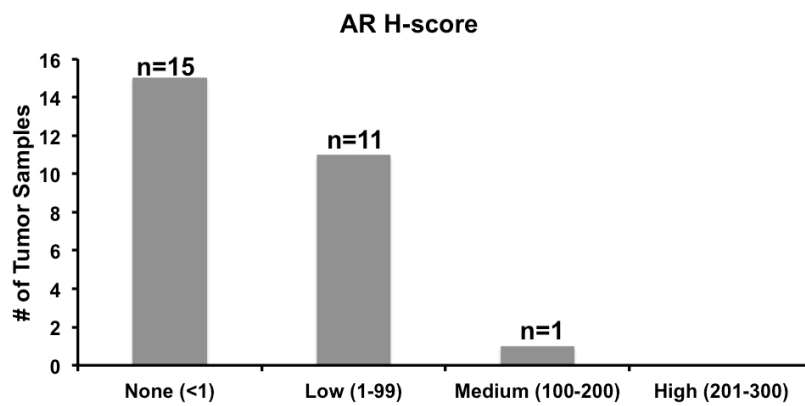**Supplementary Figure 3**

Supplement: NIHMS709169-supplement.pdf [file NIHMS709169-supplement.pdf]
